# Supplementary material for: A sporadic Alzheimer's blood-brain barrier model for developing ultrasound-mediated delivery of Aducanumab and anti-Tau antibodies
Source: PubMed Central journal article supplement (PMC9576609; doi:10.7150/thno.72685), 2022-09-25
Supplement: thnov12p6826s1.pdf [file thnov12p6826s1.pdf]

## **SUPPLEMENTARY MATERIAL**

**A sporadic Alzheimer's blood-brain barrier model for developing  
ultrasound-mediated delivery of Aducanumab and anti-Tau antibodies**

Wasielewska *et al.*

## **SUPPLEMENTAL FIGURES**

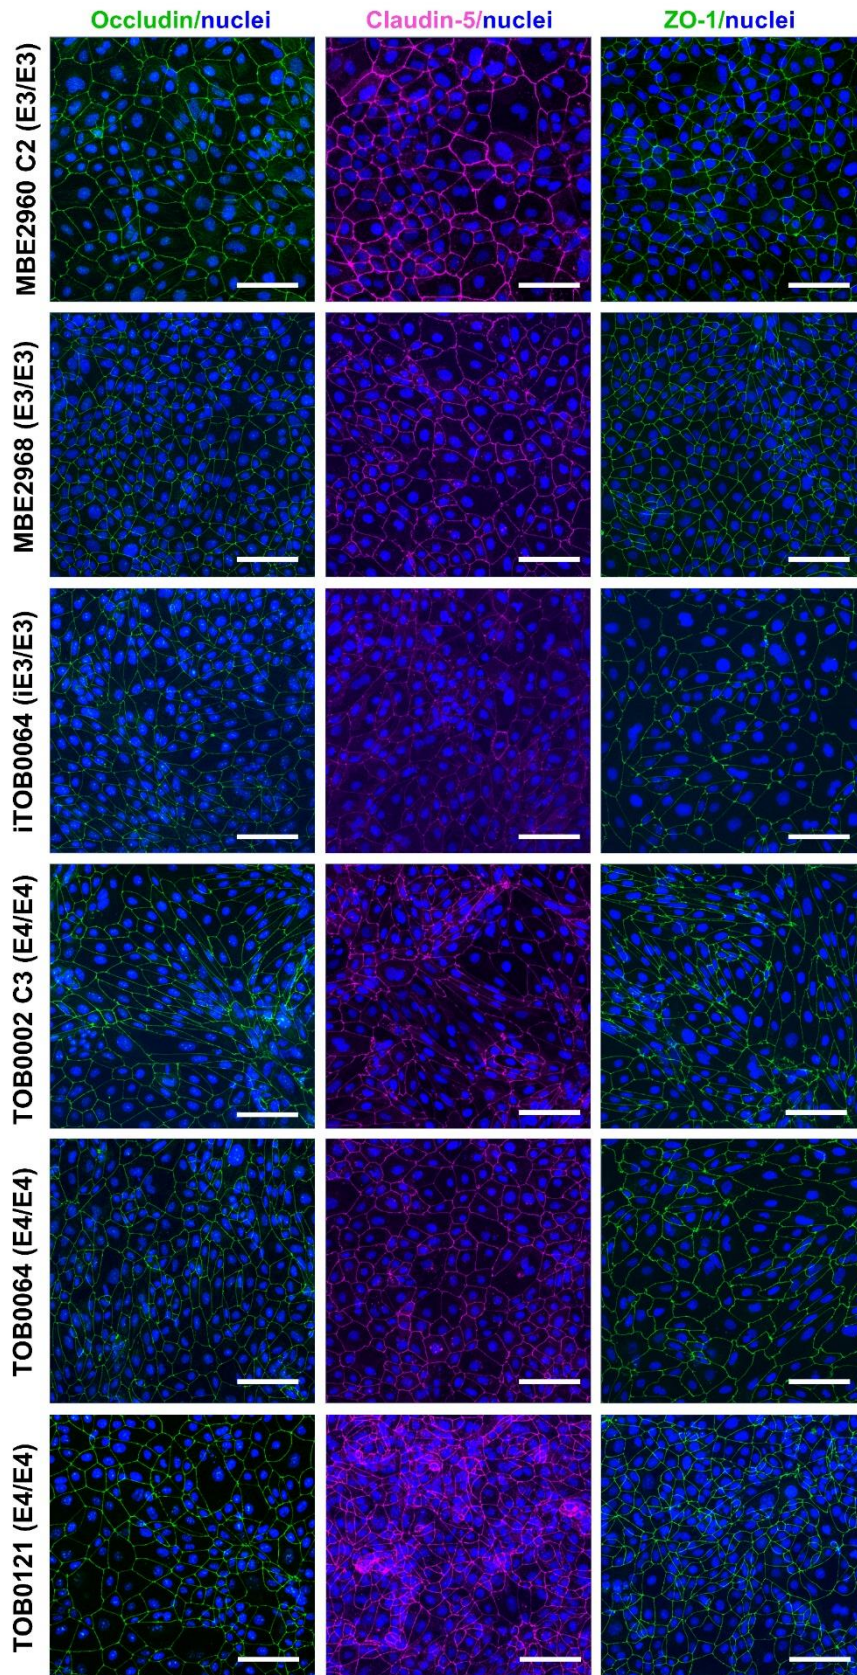

**Figure S1.** Characterization of iBECs generated from individual iPSC lines. Immunofluorescence images of occludin (green), claudin-5 (magenta) and ZO-1 (green) in

iBECs generated from *APOE3* and *APOE4* induced pluripotent stem cells (iPSCs) used in this study. Hoechst counterstain, scale bar = 100  $\mu\text{m}$ .

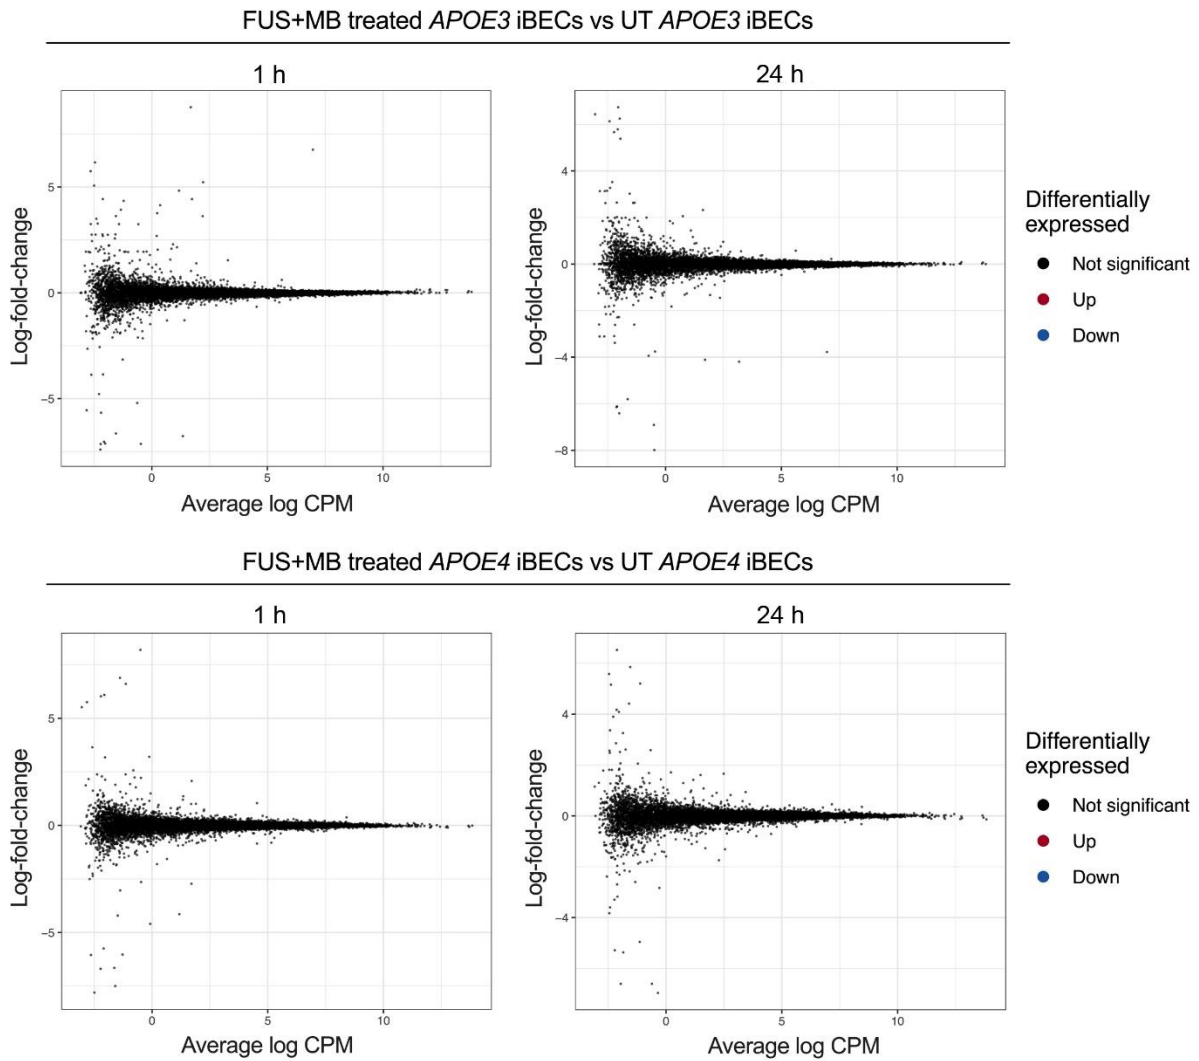

**Figure S2. Differential expression analysis of FUS<sup>+MB</sup> treated iBEC vs untreated iBECs at 1 h and 24 h for *APOE3* and *APOE4* genotypes.** Mean-difference (MD) plots showing log-fold-change versus average log expression values (log<sub>2</sub> counts per million, CPM). Upper panel: FUS<sup>+MB</sup> treated *APOE3* iBECs at 1 h vs untreated (UT) *APOE3* iBECs at 1 h and FUS<sup>+MB</sup> treated *APOE3* iBECs at 24 h vs UT *APOE3* iBECs at 24 h. Lower panel: FUS<sup>+MB</sup> treated *APOE4* iBECs at 1 h vs UT *APOE4* iBECs at 1 h and FUS<sup>+MB</sup> treated *APOE4* iBECs at 24 h vs UT *APOE4* iBECs at 24 h.

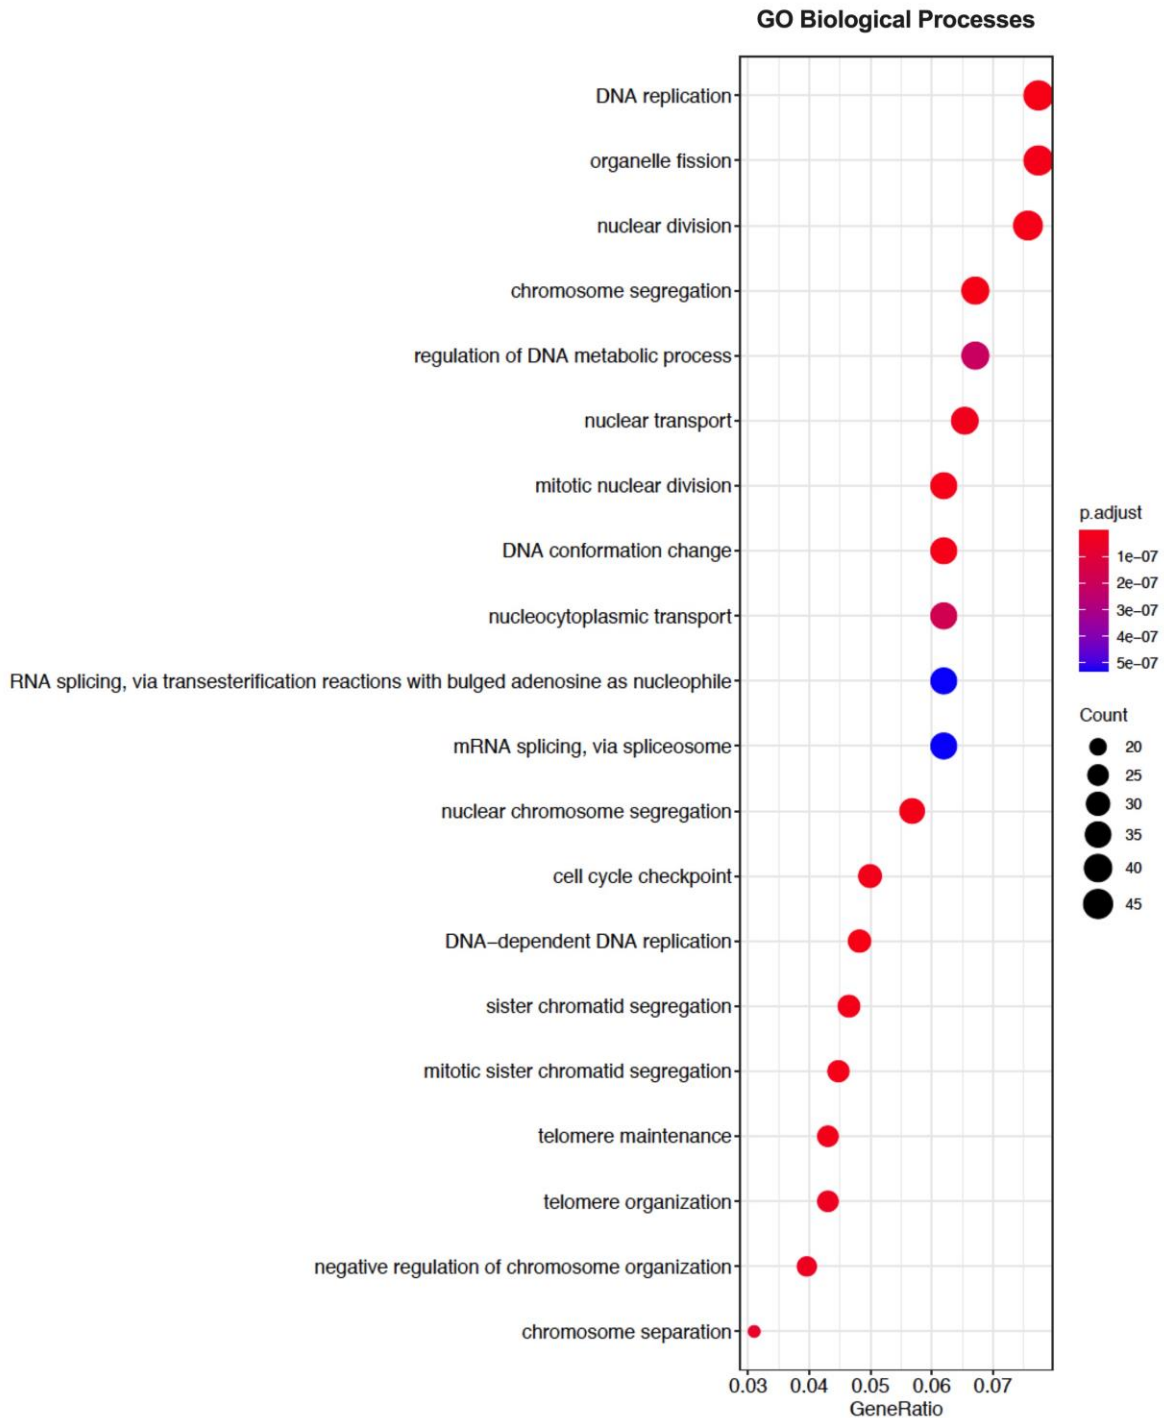

**Figure S3. Dotplot of top gene ontology (GO) terms from sub ontology Biological Process enriched from comparison of UT *APOE4* iBECs at 1 h vs *APOE3* iBECs at 1 h.** The top 20 GO processes according to *P*-value plotted in order of gene ratio. The size of the dots represents the number of genes associated with the GO term and the color of the dots represent the *P*-adjusted values. The differentially expressed genes (FDR < 0.05) were used for analysis.

**A**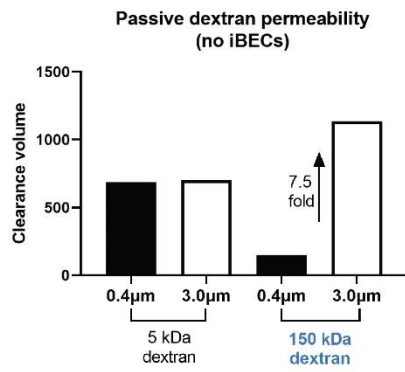**B**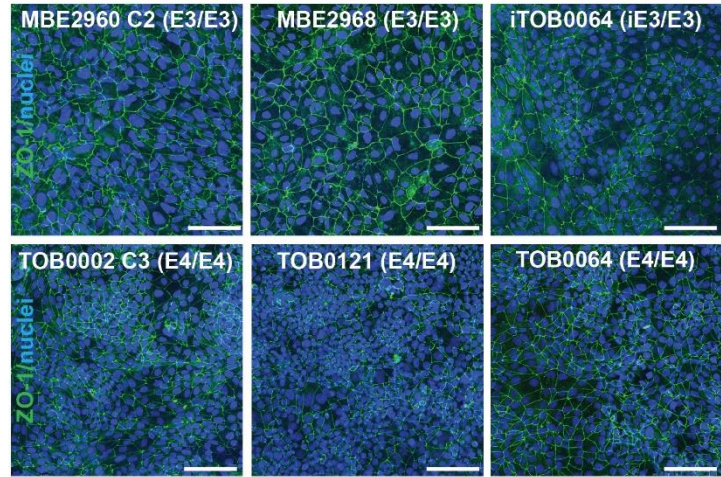**C**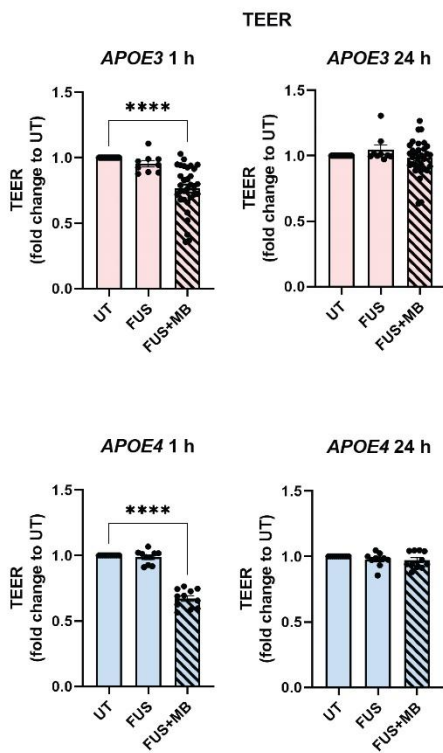**D**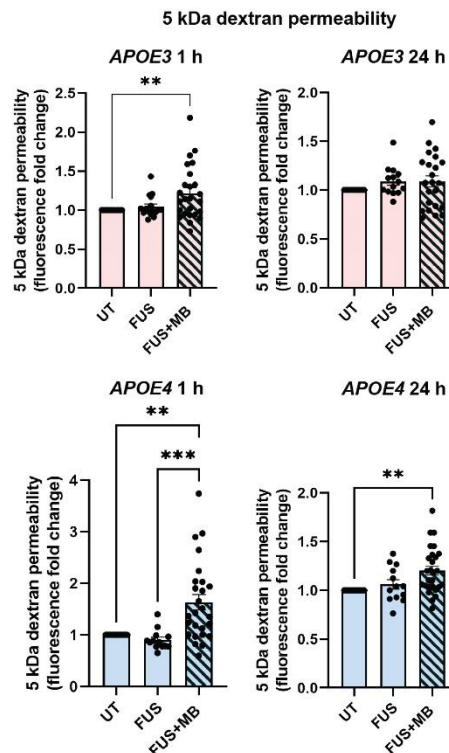**E**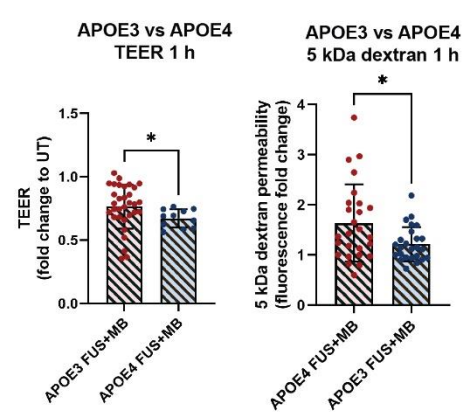**F**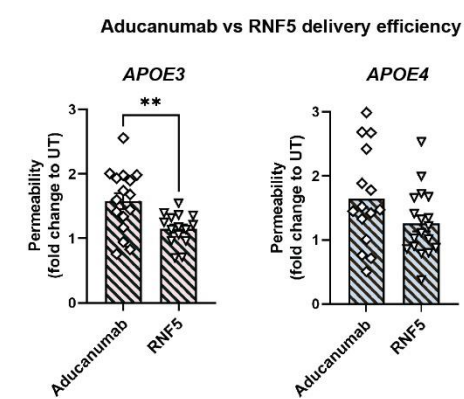

**Figure S4. Optimization of the Ø 3.0 µm pore Transwell model and characterization of the effects of FUS<sup>only</sup> and FUS<sup>+MB</sup> on iBECs.** (A) Passive permeability (clearance volume) of 5 kDa and 150 kDa dextran in collagen IV and fibronectin coated (no iBEC containing) Ø 0.4 µm and Ø 3.0 µm pore Transwell inserts. (B) Immunofluorescence of ZO-1 (green) in each individual *APOE3* and *APOE4* iBEC line seeded on Ø 3.0 µm pore Transwell inserts (Hoechst counterstain, scale bar = 100 µm). (C) Trans-endothelial electrical resistance (TEER, fold change to untreated (UT)) in *APOE3* and *APOE4* iBECs in UT, FUS<sup>only</sup> and FUS<sup>+MB</sup> conditions at 1 h and 24 h following treatment (N = 2 biological replicates and a minimum of n = 3 independent replicates per line). (D) 5 kDa dextran permeability (fluorescence fold change to UT) in *APOE3* and *APOE4* iBECs in UT, FUS<sup>only</sup> and FUS<sup>+MB</sup> conditions at 1 h and 24 h following treatment (N = 2 biological replicates and a minimum of n = 3 independent replicates per line). (E) Comparison of TEER and 5 kDa dextran permeability following FUS<sup>+MB</sup> between *APOE3* and *APOE4* iBECs (permeability shown as relative values to UT at 1 h). (F) Comparison of Aducanumab-analogue and RNF5 delivery efficiency following FUS<sup>+MB</sup> in *APOE3* and *APOE4* iBECs (permeability shown as relative values to UT at 24 h). Error bars = SEM. \*  $P < 0.05$ , \*\*  $P < 0.01$ , \*\*\*  $P < 0.001$  and \*\*\*\*  $P < 0.0001$  by one-way ANOVA for graphs with three groups and by Unpaired t-test with Welch's correction for graphs with two groups.



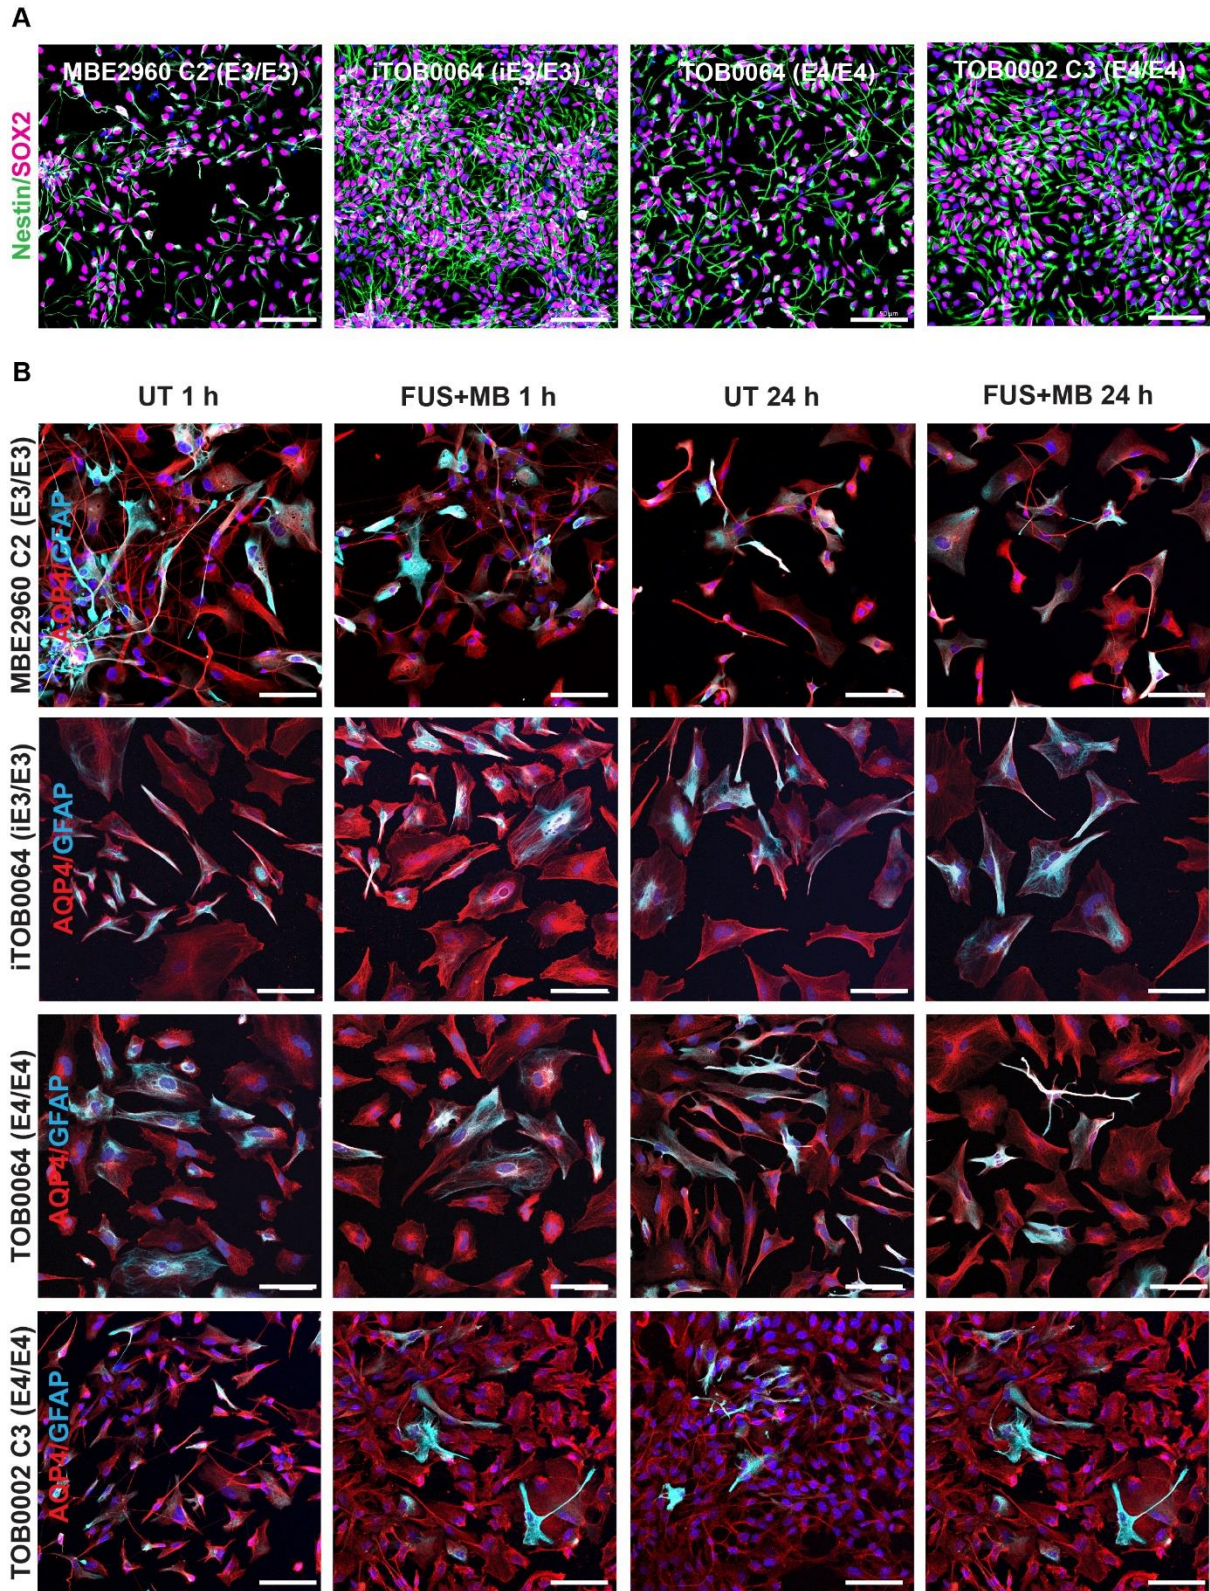

**Figure S5. Neural progenitor cell generation and FUS<sup>+MB</sup> treatment of iAstrocytes.** (A) Immunofluorescence of nestin (green) and SOX2 (magenta) in neural progenitor cells (NPCs) generated from *APOE3* and *APOE4* induced pluripotent stem cells (iPSCs) used in this study. (B) Immunofluorescence of *APOE3* and *APOE4* iAstrocytes generated from individual iPSC

lines in untreated (UT) and focused ultrasound + microbubble (FUS<sup>+MB</sup>) conditions 1 h and 24 h following treatment stained with AQP4 (red) and GFAP (cyan) (Hoechst counterstain, scale bar = 100  $\mu\text{m}$ ).

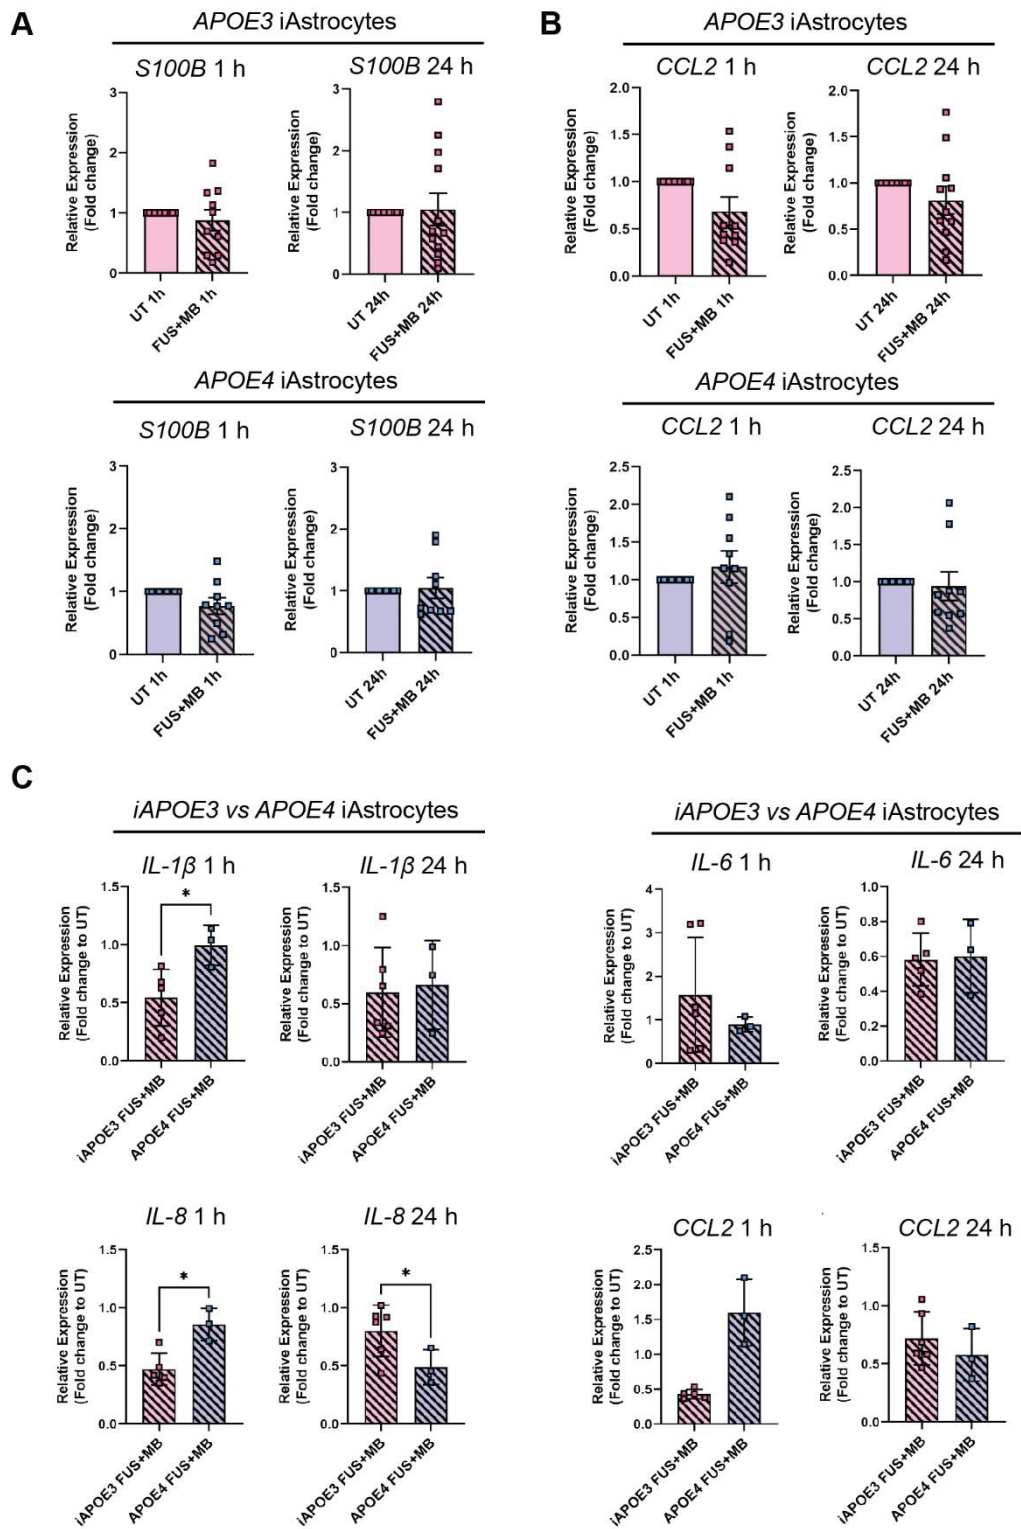

**Figure S6. Effect of FUS<sup>+MB</sup> on iAstrocyte gene expression.** Relative gene expression (fold change) of (A) astrocyte marker *S100B* and (B) inflammatory cytokine *CCL2* in UT and FUS<sup>+MB</sup> treated *APOE3* and *APOE4* iAstrocytes 1 h and 24 h after treatment, error bars = SEM. (C) Comparison of relative gene expression (fold change) of inflammatory markers between

an isogenic *iAPOE3* and *APOE4* iAstrocyte pair at 1 h and 24 h after FUS<sup>+MB</sup> treatment, error bars = SD. \*  $P < 0.05$  by Unpaired t-test with Welch's correction.

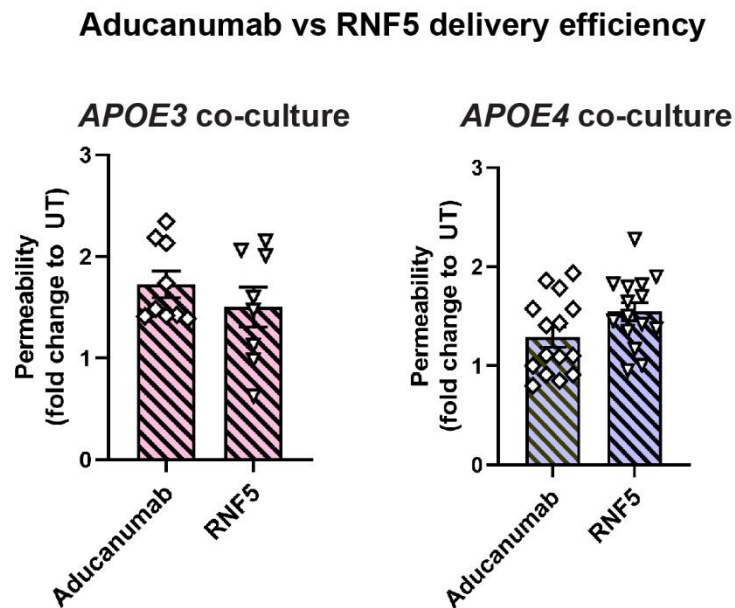

**Figure S7. Comparison of Aducanumab-analogue and RNF5 delivery efficiency following FUS<sup>+MB</sup> in *APOE3* and *APOE4* co-cultures.** Aducanumab and RNF5 delivery efficiency following FUS<sup>+MB</sup> in *APOE3* and *APOE4* iBEC and iAstrocyte co-cultures (permeability shown as relative values to UT at 24 h).

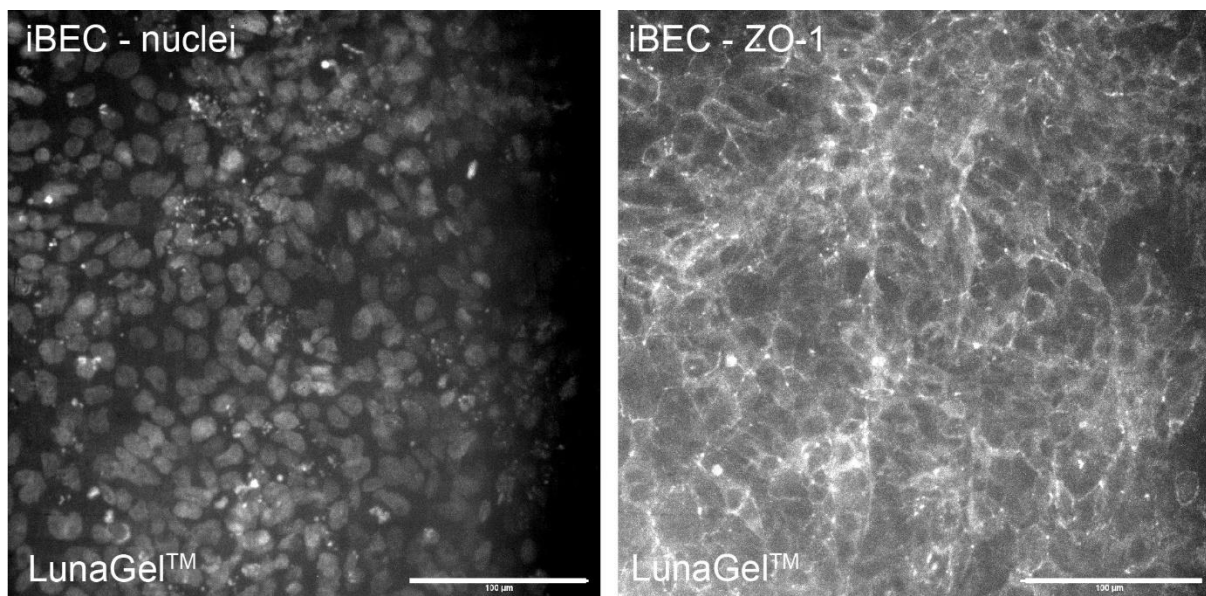

**Figure S8. iBEC barrier formation on LunaGel™.** Greyscale images of Hoechst staining (left panel) and ZO-1 staining (right panel) in iBECs seeded on LunaGel™ (scale bar = 100 µm).

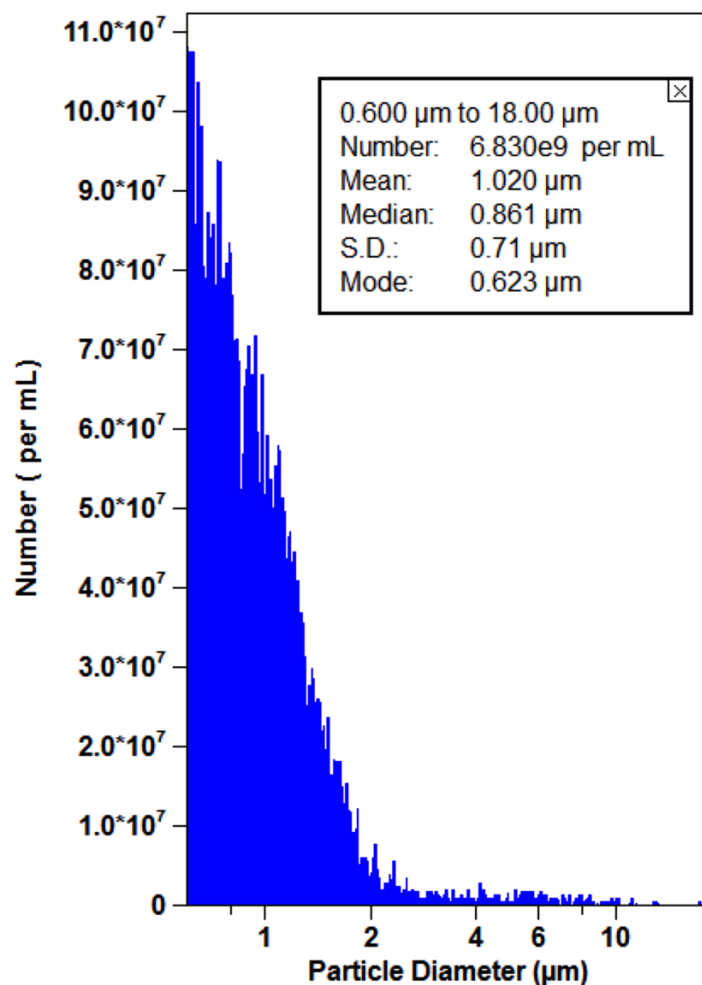

**Figure S9. Characterization of microbubbles used in the study.** Representative size and distribution profiles of in-house prepared gas-filled microbubbles measured with a Coulter counter. The average diameter of microbubbles used in the study was  $1.24 \pm 0.31 \mu\text{m}$ , with a concentration of  $7.47 \pm 6.06 \times 10^9$  MBs/ml ( $n = 6$  MB vials analysed).

## SUPPLEMENTAL TABLES

**Table S1. Results from differential expression analysis of UT *APOE4* iBECs compared to UT *APOE3* iBECs at 1 h.** Genes sorted by *P*-value. Differentially expressed genes (DEGs) defined by FDR < 0.05.

Table can be found in .xlsx format

**Table S2. Results from gene ontology (GO) enrichment analysis of sub ontology Biological Process from comparison of UT *APOE4* iBECs at 1 h vs *APOE3* iBECs at 1 h.**

Table can be found in .xlsx format

**Table S3. Primer sequences used in the study.**

| Target gene                                                            | Forward primer sequence      | Reverse primer sequence        |
|------------------------------------------------------------------------|------------------------------|--------------------------------|
| Ve-cadherin ( <i>CDH5</i> )                                            | AGGCAAGATCAAGTCAA<br>GCGT    | GAGTCTCCAGGTTTTCGC<br>CA       |
| Claudin-5 ( <i>CLDN5</i> )                                             | GATTGAGAGGTCTGGGA<br>AGCC    | ATCCCATGGCAAACAGA<br>GAGG      |
| Occludin ( <i>OCLN</i> )                                               | GAAGCAAGTGAAGGGAT<br>CTGC    | ACAACCTGGCATCAGCC<br>TTCT      |
| Zonula occludens-1 ( <i>TJP-1</i> )                                    | ACAGCTACAGGAAAATG<br>ACCGA   | ACTGGTTCAGGATCAGG<br>ACG       |
| <i>SOX18</i>                                                           | TCAGCAAGATGCTGGGC<br>AAAG    | GCGGCCGGTACTTGTAG<br>TTG       |
| Interleukin-6 ( <i>IL-6</i> )                                          | TGCAATAACCACCCCTG<br>ACC     | TGCGCAGAATGAGATGA<br>GTTG      |
| Interleukin-8 ( <i>IL-8</i> )                                          | AGACAGCAGAGCACACA<br>AGC     | ATGGTTCCTTCCGGTGGT             |
| Interleukin-1 $\beta$ ( <i>IL-1<math>\beta</math></i> )                | AATCTGTACCTGTCCTGC<br>GTGTT  | TGGGTAATTTTTGGGATC<br>TACACTCT |
| C-C motif chemokine ligand 2 ( <i>CCL2</i> )                           | GTCATAGCAGCCACCTT<br>CATT    | GGACACTTGCTGCTGGT<br>GATT      |
| Glial fibrillary acidic protein ( <i>GFAP</i> )                        | GAGGTTGAGAGGGACAA<br>TCTGG   | GTGGCTTCATCTGCTTCC<br>TGTC     |
| Aquaporin-4 ( <i>AQP-4</i> )                                           | GTAGTCACCATGGTTCAT<br>GGAAAT | TGGAACACAGCTGGCAA<br>AGA       |
| S100 calcium-binding protein $\beta$ ( <i>S100<math>\beta</math></i> ) | TTCTGGAAGGGAGGGAG<br>ACA     | CTCCTGCTCTTTGATTTC<br>CTCT     |
| <i>18S</i>                                                             | TTCGAGGCCCTGTAATTG<br>GA     | GCAGCAACTTTAATATA<br>CGCTATTGG |

**Table S4.** Antibodies used in the study.

| <b>Primary antibodies</b>   | <b>Species</b> | <b>Source</b> | <b>Identifier</b> |
|-----------------------------|----------------|---------------|-------------------|
| ZO-1                        | mouse          | Invitrogen    | Cat# 339100       |
| occludin                    | rabbit         | Invitrogen    | Cat# 711500       |
| claudin-5                   | mouse          | Invitrogen    | Cat# 352500       |
| aquaporin-4                 | mouse          | Abcam         | Cat# ab9512       |
| GFAP                        | rabbit         | Agilent/ Dako | Cat# Z0334        |
| nestin                      | mouse          | Abcam         | Cat# ab22035      |
| SOX2                        | rat            | Invitrogen    | Cat# 14981182     |
| <b>Secondary antibodies</b> |                |               |                   |
| <b>Secondary antibodies</b> | <b>Species</b> | <b>Source</b> | <b>Identifier</b> |
| anti-mouse Alexa Fluor 488  | goat           | Invitrogen    | Cat# A11029       |
| anti-mouse Alexa Fluor 594  | goat           | Invitrogen    | Cat# A11032       |
| anti-mouse Alexa Fluor 647  | goat           | Invitrogen    | Cat# A32728       |
| anti-rabbit Alexa Fluor 488 | goat           | Invitrogen    | Cat# A11034       |
| anti-rat Alexa Fluor 647    | goat           | Invitrogen    | Cat# A21247       |
